# Supplementary material for: Role and mechanisms of callose priming in mycorrhiza-induced resistance
Source: PubMed Central journal article supplement (PMC7210776; doi:10.1093/jxb/eraa030), 2020-01-27
Supplement: eraa030_suppl_supplementary_table_s1_figure_s1_s3.pdf [file eraa030_suppl_supplementary_table_s1_figure_s1_s3.pdf]

Supplementary Table 1. List of primers used for qPCR analysis.

| Primer name | PCR primers sequence (5' → 3')                           | Gene ID (NCBI) |
|-------------|----------------------------------------------------------|----------------|
| ACT-52      | F – CACCATTGGGTCTGAGCG<br>R – GGGCGACAACCTTGATCT         | 101263261      |
| ATL31       | F – CGTACTGCTGCTGCTACTCG<br>R – CATGAGATTTGAGCCAAGCA     | 101265719      |
| BAM1        | F – TCGAGTTCTGTTATGCGTTTTG<br>R – TCTCCTCAACAACCCACCTC   | 100736451      |
| BC-TUB      | F – CCGTCATGTCCGGTGTACCAC<br>R – CGACCGTTACGGAAATCGGAA   | 5441652        |
| EF-1        | F – GATTGGTGGTATTGGAAGTGTG<br>R – AGCTTCGTGGTGCATCTC     | 101244084      |
| LIN6        | F – AGCACATTTATTGCGCTTCAAC<br>R – TTTGTGACGTGGCATAATAAGA | 543502         |
| PMR4        | F – GCCGGCGGCGAGACAAGTTT<br>R – CAGCGCCAGCCAGTCAAGCA     | 101243903      |
| SUS1        | F – GGATTGAAAGCCACGGAAAGG<br>R – ACCAGGCCTCAACGAATAGCA   | 543961         |
| SUS3        | F – GGTTTCTGTCTGATTGTTATCC<br>R – ACAGAAGGGAAAAATGGCAAA  | 543731         |
| SUT1        | F – TTCCATAGCTGCTGGTGTTC<br>R – TACCAGAAATGGGTCCACAA     | 544099         |
| SUT2        | F – CCTACAGCGTCCCTTTCTCT<br>R – GGATACAACCATCTGAGGTACAA  | 543613         |
| SUT4        | F – TCTCCGCTGATATTGGATGG<br>R – GCAACATCGAGAAGCCAAAA     | 543620         |
| SWEET4      | F – CTGGGACGATGAAGAAAAGC<br>R – GTGGCTTTAAACTGTGTCCG     | 101246848      |
| SWEET15     | F – ACGCAAAGCCAGCGATAGAT<br>R – ACGTCTTCGGAATCAACAGG     | 101255592      |
| SWEET17     | F – GCTCGGCCCATCTTATGAAA<br>R – GGCAGGCTTTTCCATTTGTG     | 101255592      |
| SYP121      | F – AAGGCAAAGAATGGCATCTG<br>R – TGTCTCTTCCTTGCTCCTG      | 101247381      |

Supplementary Figure 1

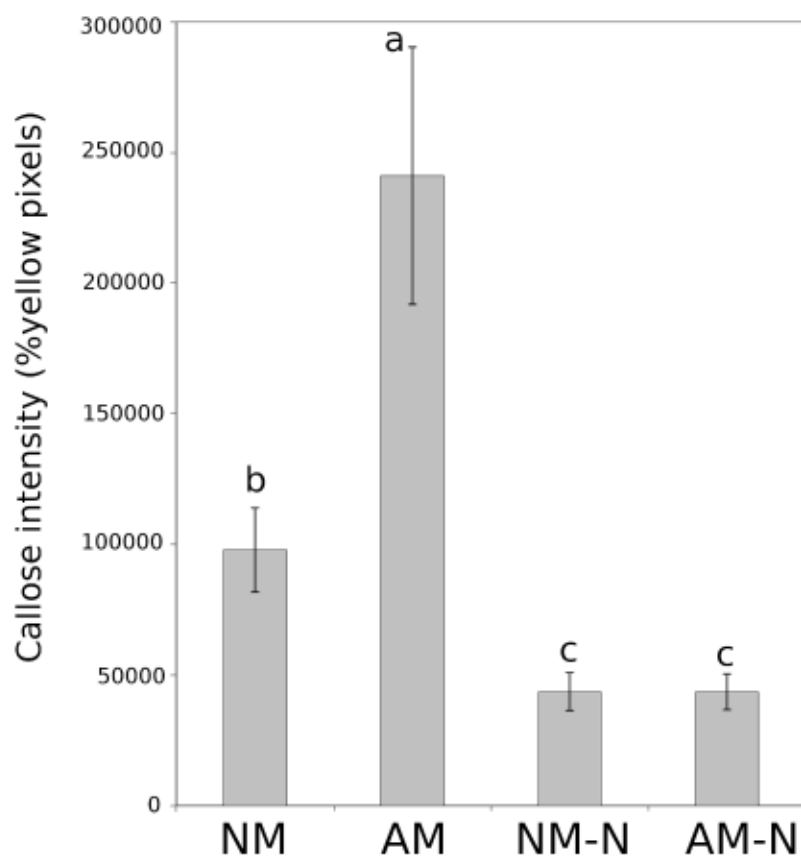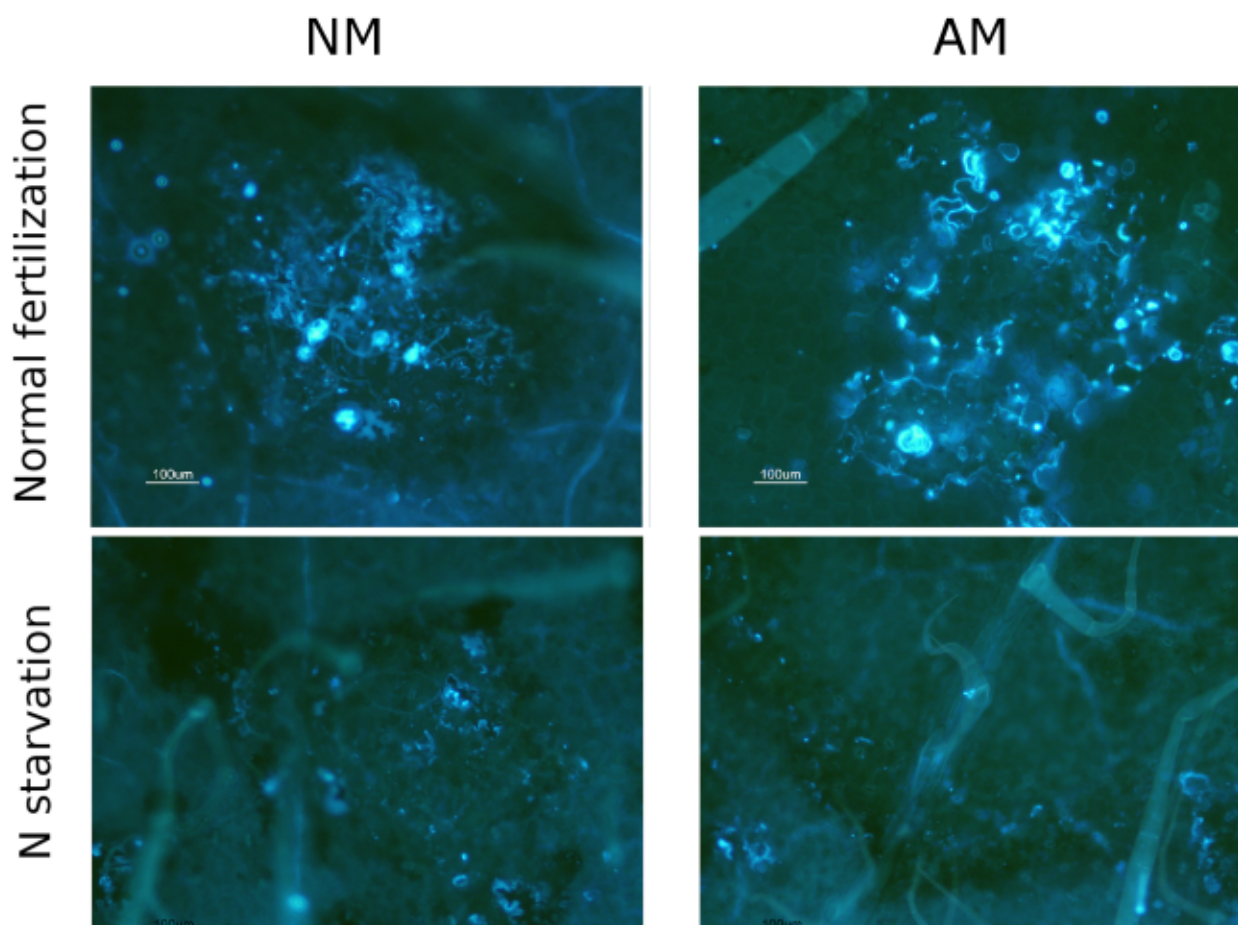

**Supplementary Figure 1. Callose deposition upon *Botrytis cinerea* infection under Nitrogen starvation.** (A) Level of callose in non-mycorrhizal (NM) and mycorrhizal (AM) infected tomato plants under normal fertilization and under 48h of nitrogen starvation (-N). Three different replicates, which consist in three pooled plants per condition, were carried out. Standard error is represented by error bars. (\*) represents statistically significant differences (T-test; n = 9).

Supplementary Figure 2

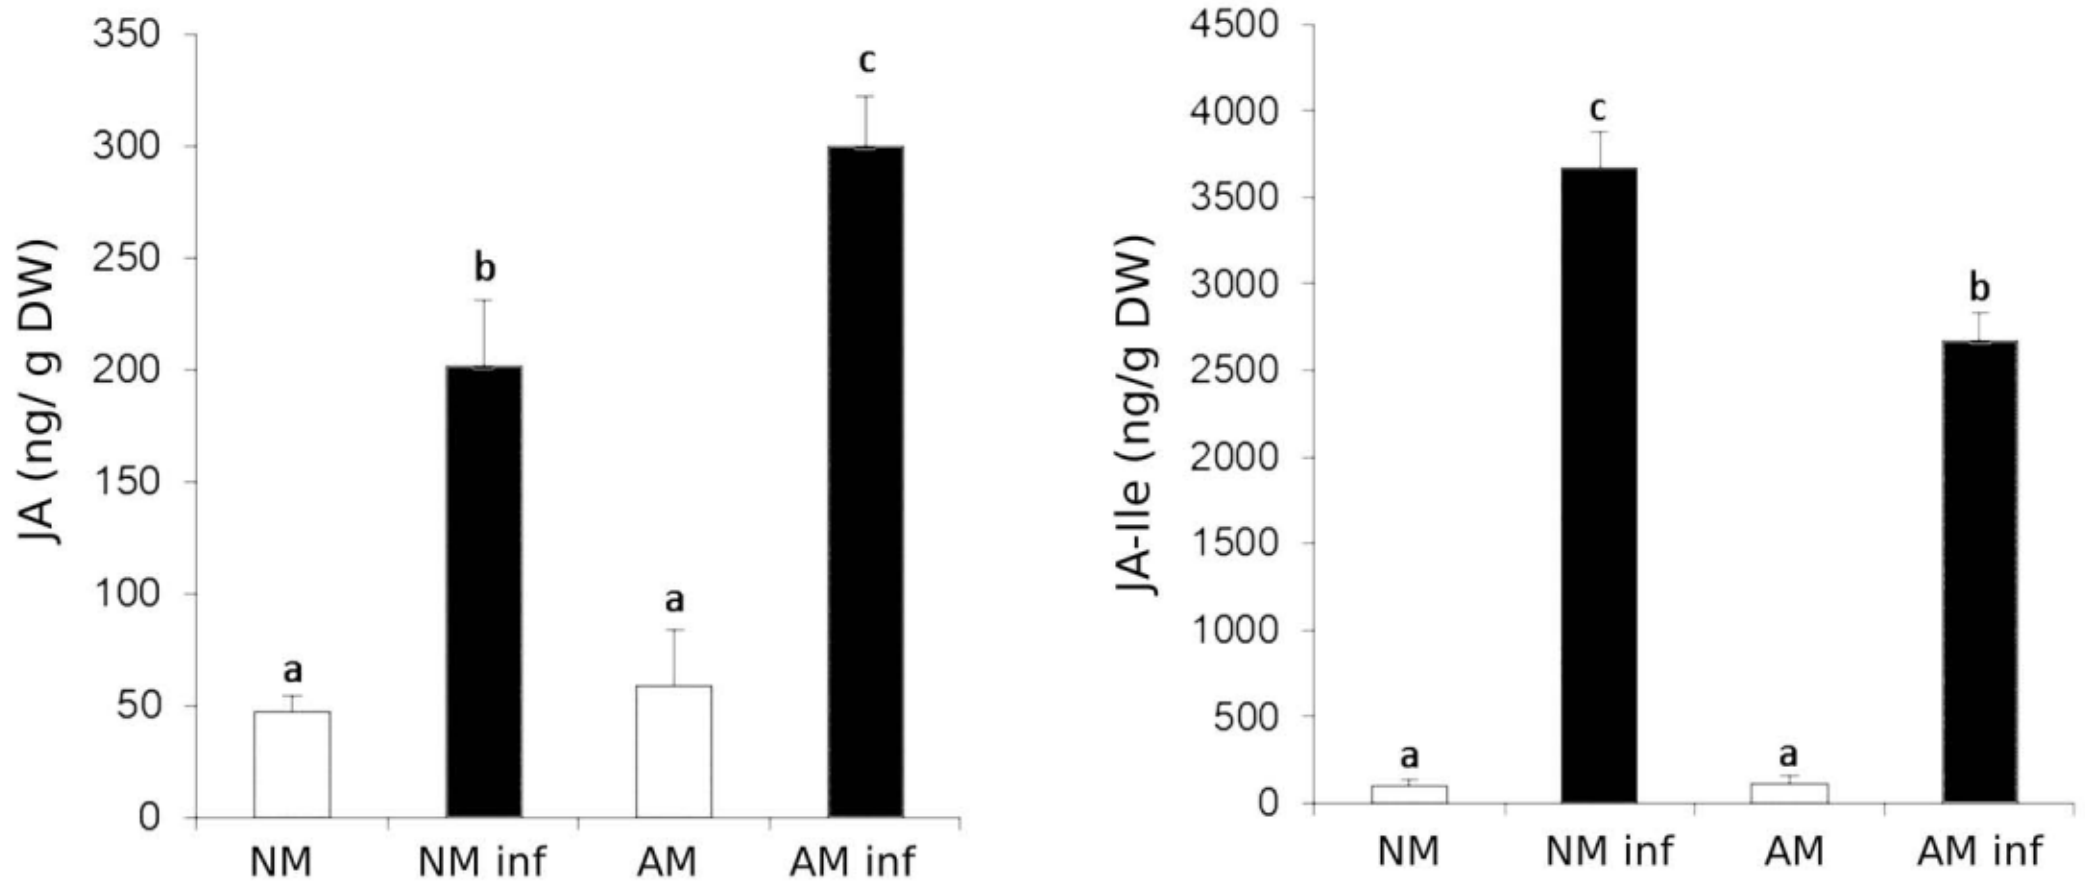

**Supplementary Figure 2. Oxylipin levels.** Targeted analysis of oxylipin hormones, JA and JA-isoleucine, in non-mycorrhizal (NM) and mycorrhizal (AM) plants 72 hpi. For each combination, infected leaves from three plants were pooled. Experiments were repeated three times to have different replicates. Letters indicate statistically significant differences (ANOVA, Fisher's least significant difference [LSD] test;  $p < 0.05$ ,  $n = 9$ ).

Supplementary Figure 3.

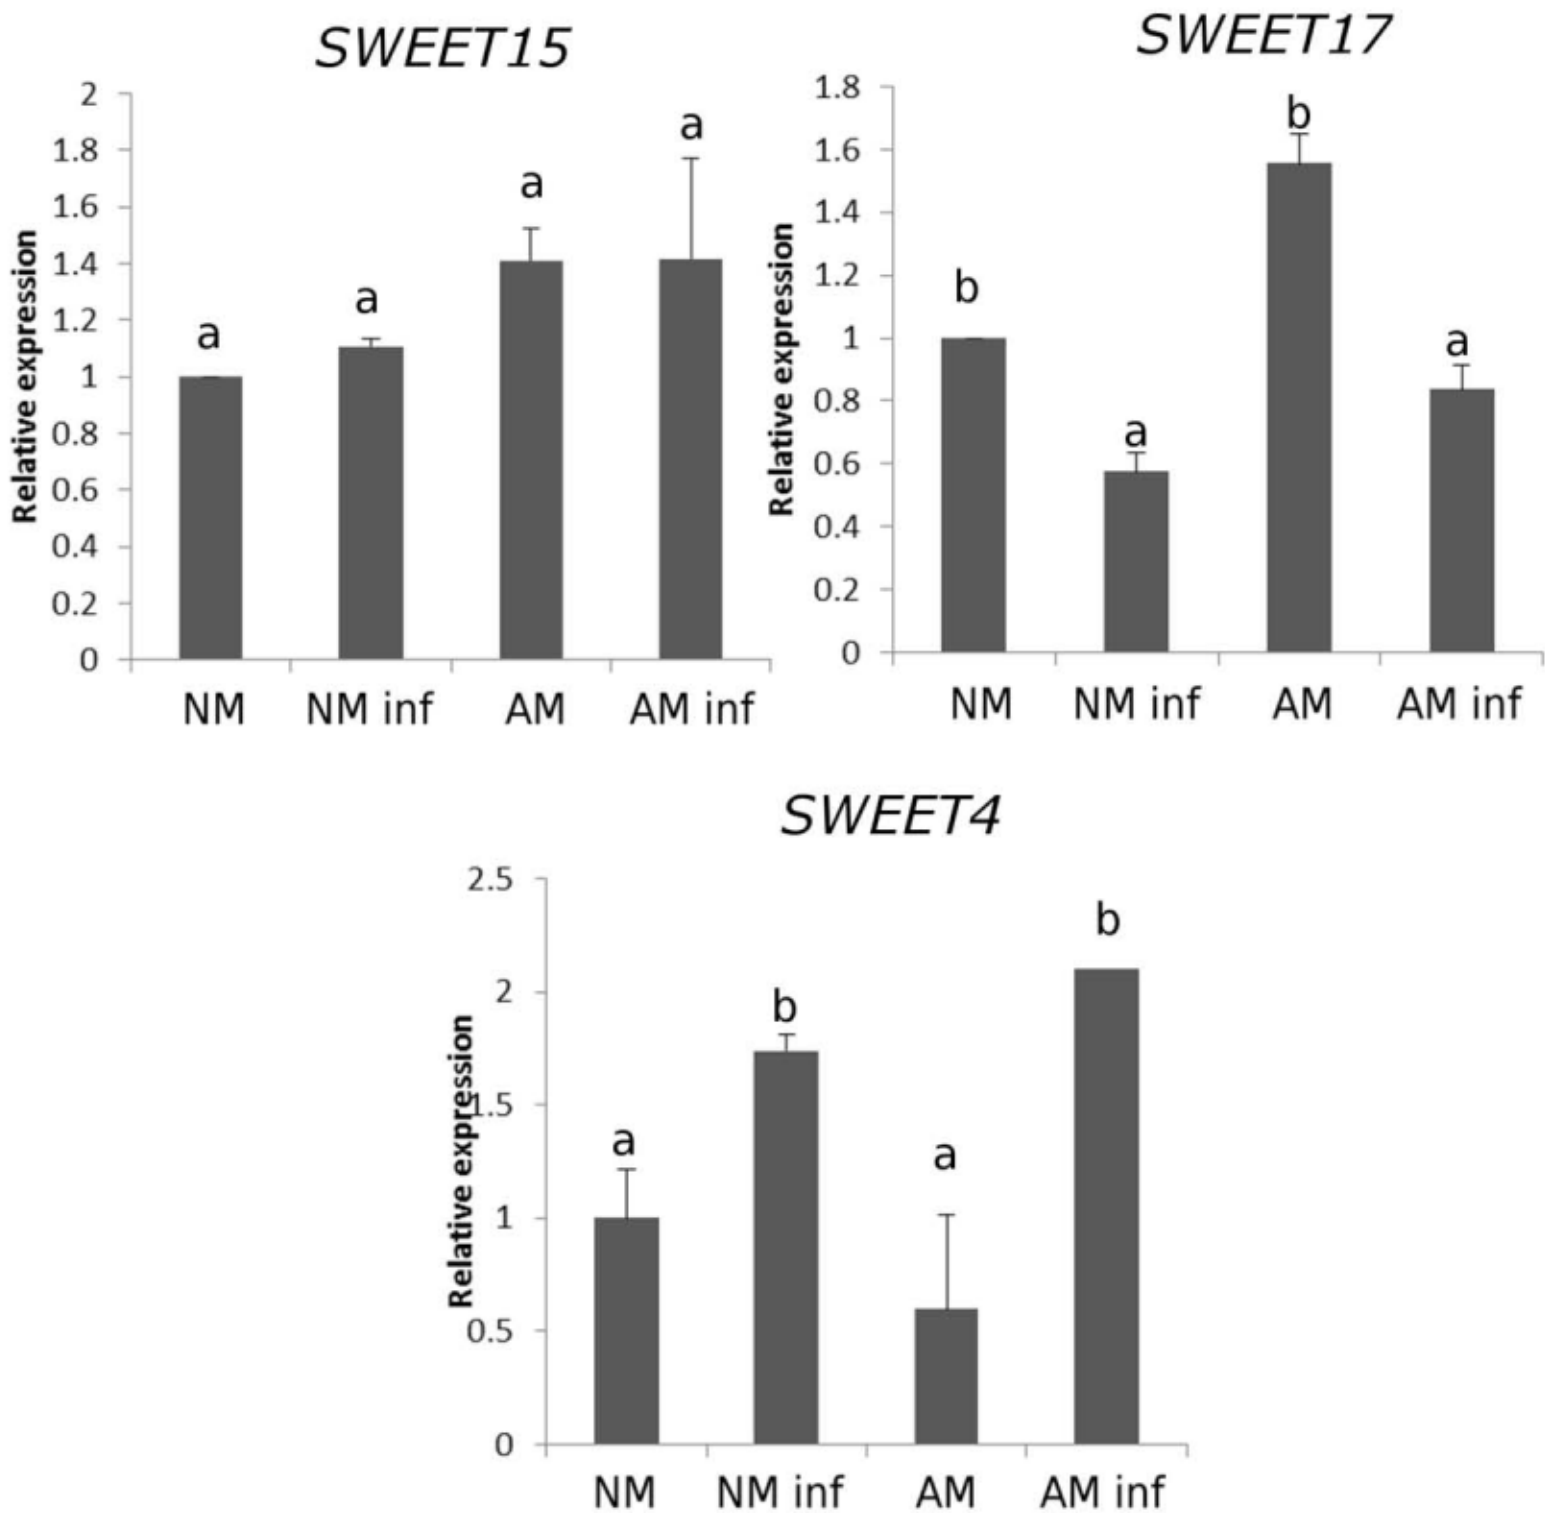

**Supplementary Figure 3. Expression levels of different *SWEET* sugar transporter genes.**

Levels of *SWEET* sugar transporters (4, 15 and 17) gene expression in non-mycorrhizal (NM) and mycorrhizal (AM) non-infected and infected (inf) tomato plants at 72 hpi. Experiments were repeated three times to have different replicates, which consist in three pooled plants for each combination. The standard error of the mean is represented by error bars and statistically significant differences are represented by different letters (ANOVA, Fisher's least significant difference [LSD] test;  $p < 0.05$ ,  $n = 9$ ).
